# Supplementary material
Source: PubMed Central journal article supplement (PMC7903224)
Supplement: advancesADV2020003508-suppl1.pdf [file advancesADV2020003508-suppl1.pdf]

**Supplementary Table S1. Genes utilized for statistical analyses.**

|               |             |               |              |              |
|---------------|-------------|---------------|--------------|--------------|
| <i>ASXL1</i>  | <i>IDH1</i> | <i>NPM1</i>   | <i>SF3B1</i> | <i>ZRSR2</i> |
| <i>CBL</i>    | <i>IDH2</i> | <i>NRAS</i>   | <i>SRSF2</i> |              |
| <i>DNMT3A</i> | <i>JAK2</i> | <i>PHF6</i>   | <i>TET2</i>  |              |
| <i>ETV6</i>   | <i>KIT</i>  | <i>RUNX1</i>  | <i>TP53</i>  |              |
| <i>EZH2</i>   | <i>MPL</i>  | <i>SETBP1</i> | <i>U2AF1</i> |              |

| Clinical Variable            | Median OS (months) | Univariate |          | Multivariate |            |          |
|------------------------------|--------------------|------------|----------|--------------|------------|----------|
|                              |                    | HR         | p-value  | HR           | 95% CI     | p-value  |
| Age                          |                    |            |          |              |            |          |
| <65 (n = 71)                 | 16.1               | 0.73       | 0.14     | 1.00         | 0.97-1.02  | 0.77     |
| >65 (n = 176)                | 14.1               |            |          |              |            |          |
| Gender                       |                    |            |          |              |            |          |
| Male (n = 160)               |                    |            |          | 1.23         | 0.79-1.91  | 0.37     |
| Female (n = 87)              |                    |            |          |              |            |          |
| WHO 2016 classification      |                    |            | *0.003   | 0.99         | 0.87-1.11  | 0.80     |
| IPSS-R#                      |                    |            | *< 0.001 |              |            | *< 0.001 |
| Very low (n = 15)            | NR                 |            |          |              |            |          |
| Low (n = 36)                 | 24                 |            |          | 1.45         | 0.39-5.42  | 0.58     |
| Intermediate (n= 57)         | 25.8               |            |          | 2.14         | 0.61-7.52  | 0.24     |
| High (n = 51)                | 33.2               |            |          | 2.86         | 0.83-9.86  | 0.10     |
| Very High (n = 85)           | 10.3               |            |          | 6.88         | 2.05-23.14 | 0.002    |
| t-MDS                        |                    |            |          |              |            |          |
| yes (n = 60)                 | 12.3               | 1.65       | *0.01    | 1.32         | 0.81-2.14  | 0.26     |
| no (n = 187)                 | 17                 |            |          |              |            |          |
| ANC                          |                    |            |          |              |            |          |
| <1000 (n = 100)              | 14.2               | 1.02       | 0.92     |              |            |          |
| >1000 (n = 143)              | 16.1               |            |          |              |            |          |
| Hemoglobin                   |                    |            |          |              |            |          |
| <10 (n = 169)                | 13.7               | 1.7        | *0.01    | 1.07         | 0.54-2.11  | 0.85     |
| >10 (n= 77)                  | 27.9               |            |          |              |            |          |
| Platelets                    |                    |            |          |              |            |          |
| <100 (n = 169)               | 14.1               | 1.25       | 0.29     |              |            |          |
| >100 (n = 77)                | 18.5               |            |          |              |            |          |
| Number of cytopenias         |                    |            |          |              |            |          |
| 0 (n = 16)                   | 35.4               |            |          |              |            |          |
| 1 (n = 76)                   | 18.1               |            | *0.03    | 1.14         | 0.81-1.61  | 0.46     |
| 2 (n = 100)                  | 12.8               |            |          |              |            |          |
| 3 (n = 54)                   | 15                 |            |          |              |            |          |
| Bone marrow blast percentage |                    |            |          |              |            |          |
| <5% (n = 63)                 | 24                 |            | 0.05     | 1.08         | 0.80-1.45  | 0.61     |
| 5-9% (n = 69)                | 14.4               |            |          |              |            |          |
| ≥10% (n = 115)               | 13.2               |            |          |              |            |          |
| Allo-HCT                     |                    |            |          |              |            |          |
| yes (n = 61)                 | NR                 | 0.35       | *<0.001  | 0.28         | 0.15-0.52  | *<0.001  |
| no (n = 186)                 | 12.4               |            |          |              |            |          |
| Response to HMA              |                    |            |          |              |            |          |
| Response (n = 104)           | 18.5               | 0.60       | *0.009   | 0.30         | 0.20-0.47  | *<0.001  |
| No response (n = 143)        | 12.8               |            |          |              |            |          |

**Supplementary Table S2. Clinical variables predictive of overall survival.** Performance of clinical variables as predictors of overall survival, with results of univariate and multivariate analysis displayed. #Hazard ratios in multivariate analysis represent comparison of each risk group to the very low risk group. \*denotes statistical significance. Abbreviations: OS, overall survival; HR, hazard ratio; CI, confidence interval; WHO, World Health Organization; IPSS-R, revised international prognostic scoring system; NR, not reached; t-MDS, therapy-related MDS; ANC, absolute neutrophil count; Allo-HCT, allogeneic hematopoietic cell transplant; HMA, hypomethylating agent.

| Genotype                         | CR rate | Univariate |                      | Multivariate |         | ORR rate | Univariate  |                     | Multivariate |  |
|----------------------------------|---------|------------|----------------------|--------------|---------|----------|-------------|---------------------|--------------|--|
|                                  |         | p-value    | OR (95% CI)          | p-value      | p-value |          | OR (95% CI) | p-value             |              |  |
| Total Cohort (n=165)             | 12.1%   |            |                      |              |         | 41.2%    |             |                     |              |  |
| NGS Result                       |         |            |                      |              |         |          |             |                     |              |  |
| No Mutation (n=28)               | 20.6%   | 0.21       |                      |              |         | 51.7%    | 0.22        |                     |              |  |
| ≥1 mutation (n=131)              | 10.8%   |            |                      |              |         | 39.2%    |             |                     |              |  |
| <i>TET2</i>                      |         |            |                      |              |         |          |             |                     |              |  |
| Mut (n=33)                       | 21.2%   | 0.07       | 4.63<br>(1.31-16.42) | *0.02        |         | 54.5%    | *0.01       | 1.92<br>(0.84-4.39) | 0.12         |  |
| WT (n=118)                       | 9.3%    |            |                      |              |         | 39.0%    |             |                     |              |  |
| <i>ASXL1</i>                     |         |            |                      |              |         |          |             |                     |              |  |
| Mut (n=44)                       | 4.5%    | 0.1        | 0.14<br>(0.02-1.32)  | 0.09         |         | 31.8%    | 0.16        | 0.57<br>(0.24-1.33) | 0.19         |  |
| Wt (n=121)                       | 14.9%   |            |                      |              |         | 44.6%    |             |                     |              |  |
| <i>TET2</i> Mut/ <i>ASXL1</i> WT |         |            |                      |              |         |          |             |                     |              |  |
| Present (n=21)                   | 33.3%   | *0.005     | 6.51<br>(1.69-25.16) | *0.007       |         | 61.9%    | 0.06        | 2.3<br>(0.83-6.37)  | 0.10         |  |
| Other (n=136)                    | 8.8%    |            |                      |              |         | 38.2%    |             |                     |              |  |
| <i>DNMT3A</i>                    |         |            |                      |              |         |          |             |                     |              |  |
| Mut (n=26)                       | 8.6%    | 0.31       |                      |              |         | 45.7%    | 0.85        |                     |              |  |
| WT (n=123)                       | 16.1%   |            |                      |              |         | 43.0%    |             |                     |              |  |
| <i>EZH2</i>                      |         |            |                      |              |         |          |             |                     |              |  |
| Mut (n=14)                       | 14.3%   | 0.68       |                      |              |         | 35.7%    | 0.78        |                     |              |  |
| WT (n=151)                       | 11.9%   |            |                      |              |         | 41.7%    |             |                     |              |  |
| DNA Methylation                  |         |            |                      |              |         |          |             |                     |              |  |
| Mut (n=63)                       | 11.5%   | 0.99       |                      |              |         | 50%      | 0.51        |                     |              |  |
| WT (n=86)                        | 12.2%   |            |                      |              |         | 41.5%    |             |                     |              |  |
| Epigenetic Regulation            |         |            |                      |              |         |          |             |                     |              |  |
| Mut (n=100)                      | 13%     | >0.99      |                      |              |         | 40%      | 0.62        |                     |              |  |
| WT (n=57)                        | 12.1%   |            |                      |              |         | 44.8%    |             |                     |              |  |
| <i>SF3B1</i>                     |         |            |                      |              |         |          |             |                     |              |  |
| Mut (n=11)                       | 9.1%    | >0.99      |                      |              |         | 27.3%    | 0.35        |                     |              |  |
| WT (n=141)                       | 12.8%   |            |                      |              |         | 44%      |             |                     |              |  |
| Any Spliceosome                  |         |            |                      |              |         |          |             |                     |              |  |
| Mut (n=67)                       | 5.9%    | *0.047     | 0.42<br>(0.11-1.55)  | 0.19         |         | 38.8%    | 0.51        | 0.88<br>(0.43-1.80) | 0.73         |  |
| WT (n=84)                        | 16.7%   |            |                      |              |         | 45.2%    |             |                     |              |  |
| <i>RUNX1</i>                     |         |            |                      |              |         |          |             |                     |              |  |
| Mut (n=23)                       | 13%     | >0.99      |                      |              |         | 43.5%    | 0.82        |                     |              |  |
| WT (n=142)                       | 12%     |            |                      |              |         | 40.8%    |             |                     |              |  |
| Signaling Pathway                |         |            |                      |              |         |          |             |                     |              |  |
| Mut (n=30)                       | 3.6%    | 0.20       |                      |              |         | 32.1%    | 0.29        |                     |              |  |
| WT (n=120)                       | 13.8%   |            |                      |              |         | 44.7%    |             |                     |              |  |

**Supplementary Table S3. Molecular predictors of response in the *TP53* wild-type cohort.** Summarizes the impact of somatic gene mutations and specific genotypes on overall response rate and complete remission rate. \*denotes statistical significance. Abbreviations: CR, complete remission; ORR, overall response rate; OR, odds ratio; CI, confidence interval; NGS, next generation sequencing; Mut, mutant; WT, wild-type.

| Genotype                         | Median OS (months) | Univariate |         | Multivariate |           |         |
|----------------------------------|--------------------|------------|---------|--------------|-----------|---------|
|                                  |                    | HR         | p-value | HR           | 95% CI    | p-value |
| Total Cohort (n=165)             | 21.7               |            |         |              |           |         |
| NGS Result                       |                    |            |         |              |           |         |
| No Mutation (n=28)               | 24                 | 0.63       | 0.18    |              |           |         |
| ≥1 mutation (n=131)              | 18.6               |            |         |              |           |         |
| Number of Mutations              |                    |            | *0.03   | 1.16         | 0.98-1.38 | 0.08    |
| <i>TET2</i>                      |                    |            |         |              |           |         |
| Mut (n=33)                       | 18.6               | 0.96       | 0.9     |              |           |         |
| WT (n=118)                       | 21.7               |            |         |              |           |         |
| <i>ASXL1</i>                     |                    |            |         |              |           |         |
| Mut (n=44)                       | 18.6               | 1.2        | 0.48    |              |           |         |
| Wt (n=121)                       | 21.7               |            |         |              |           |         |
| <i>TET2</i> Mut/ <i>ASXL1</i> WT |                    |            |         |              |           |         |
| Present (n=21)                   | 16.1               | 0.76       | 0.77    |              |           |         |
| Other (n=136)                    | 21                 |            |         |              |           |         |
| <i>DNMT3A</i>                    |                    |            |         |              |           |         |
| Mut (n=26)                       | 12.9               | 1.6        | 0.17    |              |           |         |
| WT (n=123)                       | 19.1               |            |         |              |           |         |
| <i>EZH2</i>                      |                    |            |         |              |           |         |
| Mut (n=14)                       | 11.4               | 4.4        | *<0.001 | 2.30         | 1.05-5.07 | *0.04   |
| WT (n=151)                       | 24                 |            |         |              |           |         |
| DNA Methylation Mutation         |                    |            |         |              |           |         |
| Mut (n=63)                       | 17                 | 1.2        | 0.57    |              |           |         |
| WT (n=86)                        | 21.7               |            |         |              |           |         |
| Epigenetic Regulation Mutation   |                    |            |         |              |           |         |
| Mut (n=100)                      | 17                 | 1.55       | 0.12    |              |           |         |
| WT (n=57)                        | 21.7               |            |         |              |           |         |
| <i>SF3B1</i>                     |                    |            |         |              |           |         |
| Mut (n=11)                       | 21                 | 1.06       | 0.91    |              |           |         |
| WT (n=141)                       | 19.1               |            |         |              |           |         |
| Any Spliceosome                  |                    |            |         |              |           |         |
| Mut (n=67)                       | 21                 | 0.98       | 0.94    |              |           |         |
| WT (n=84)                        | 18.1               |            |         |              |           |         |
| <i>RUNX1</i>                     |                    |            |         |              |           |         |
| Mut (n=23)                       | 12.4               | 1.66       | 0.14    |              |           |         |
| WT (n=142)                       | 23.8               |            |         |              |           |         |
| Signaling Pathway                |                    |            |         |              |           |         |
| Mut (n=30)                       | 16.1               | 1.4        | 0.29    |              |           |         |
| WT (n=120)                       | 21                 |            |         |              |           |         |

**Supplementary Table S4. Molecular predictors of overall survival in the *TP53* wild-type cohort.** Summarizes the impact of various somatic gene mutations and genotypes on overall survival in the cohort restricted to *TP53* wild-type patients. \*denotes statistical significance. Abbreviations: OS, overall survival; HR, hazard ratio; CI, confidence interval; NGS, next generation sequencing; Mut, mutant; WT, wild-type.

**Supplementary Figure S1. Impact of mutation clearance on overall survival in patients proceeding to allo-HCT**

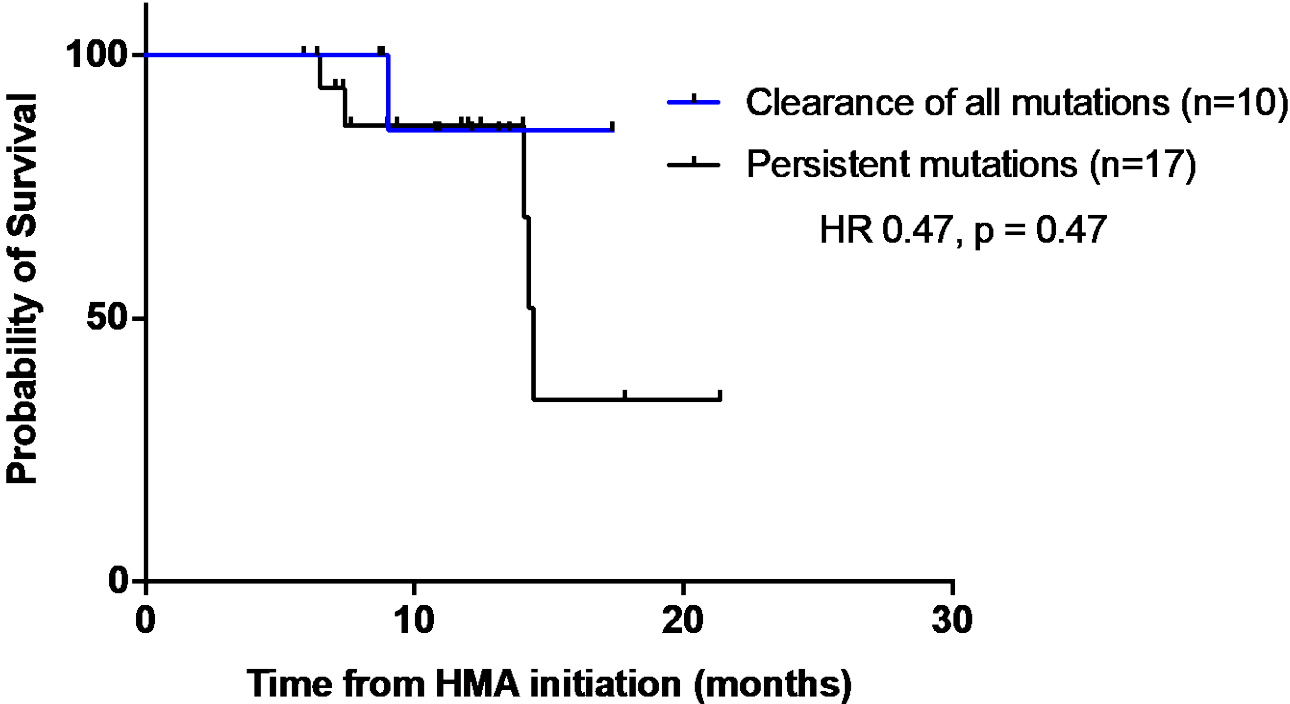

**Supplementary Figure S1.** Overall survival of all patients who underwent serial molecular analysis prior to proceeding to allo-HCT. Patients who demonstrated complete clearance of all prior detectable mutations with frontline HMA therapy (median OS not reached) are compared to those who had persistent mutations detected (median OS of 14.4 months). Abbreviation: allo-HCT, allogeneic hematopoietic cell transplant.

Supplementary Figure S2. Overall survival by *TP53* and *RUNX1* genotype

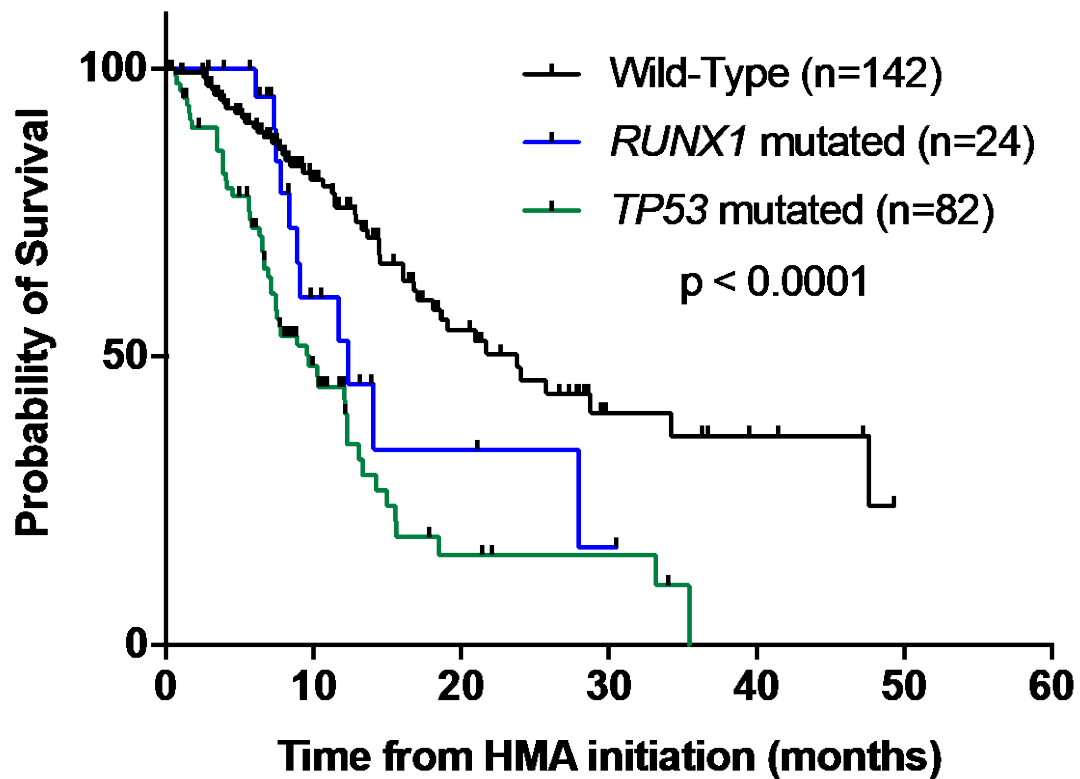

Supplementary Figure S2. Overall survival of patients stratified by both *TP53* and *RUNX1* mutation status. Median OS of 23.8 months for wild-type patients, 12.4 months for *RUNX1* mutated patients and 9.7 months for *TP53* mutated patients.
